# Supplementary material
Source: publisher figshare collection journal article supplement (https://karger.figshare.com/ndownloader/files/28172088)
Supplement: Supplementary file 1 [file 28172088]

| Case | Depth | Origin | Surgical Margin | N Staging | M Staging |
| --- | --- | --- | --- | --- | --- |
| 1 | 5 | * | Positive | 3 | 0 |
| 2 | 8.5 | Buccal mucosa | Negative | x | 0 |
| 3 | 1.1 | Floor of the mouth | Negative | 2b | 0 |
| 4 | 3 | Retromolar Trigone | Negative | 3 | 0 |
| 5 | 1.3 | Retromolar Trigone | Negative | 2b | 0 |
| 6 | 6 | Floor of the mouth | Negative | 0 | 0 |
| 7 | 3 | Retromolar Trigone | Positive | 1 | 0 |
| 8 | 6 | Floor of the mouth | Negative | 0 | 0 |
| 9 | ***** | Hard Palate | Negative | 0 | 0 |
| 10 | 6.5 | Floor of the mouth | Positive | 0 | 1 |
| 11 | 6.5 | Floor of the mouth | Positive | 2b | 0 |
| 12 | * | Lip | Negative | 0 | 0 |
| 13 | * | Floor of the mouth | Positive | 0 | 0 |
| 14 | 0.7 | Retromolar Trigone | Positive | 2b | 0 |
| 15 | 1.4 | Retromolar Trigone | Negative | 2c | 0 |
| 16 | 0.7 | Inferior Gingiva | Negative | 1 | 0 |
| 17 | 1 | Retromolar Trigone | Negative | 1 | 1 |
| 18 | 5.5 | Hard Palate | Negative | 1 | 0 |
| 19 | 2.3 | Floor of the mouth | Negative | 0 | 0 |
| 20 | 2.2 | Floor of the mouth | Negative | 2b | 0 |
| 21 | 3.1 | Superior Gingiva | Negative | 1 | 0 |
| 22 | 3.5 | Floor of the mouth | Negative | 0 | 1 |
| 23 | 1.8 | Tongue | Negative | x | 0 |
| 24 | 5.5 | Base of Tongue | Negative | 0 | 1 |
| 25 | 0.6 | Floor of the mouth | Negative | 0 | 0 |
| 26 | 2.5 | Floor of the mouth | Negative | 0 | 0 |
| 27 | 3.2 | Tongue | Positive | 0 | 0 |
| 28 | 2.5 | Inferior Gingiva | Positive | 1 | 0 |
| 29 | 2 | Floor of the mouth | Negative | 2b | 0 |
| 30 | 1.5 | Retromolar Trigone | Negative | 2b | 0 |
| 31 | 2.8 | Tongue | Negative | 2c | 0 |
| 32 | 1.7 | Buccal mucosa | Negative | 0 | 0 |
| 33 | 5.5 | Floor of the mouth | Positive | 0 | 0 |
| 34 | 3.2 | Floor of the mouth | Negative | 2b | 1 |
| 35 | 2.2 | Peritonsilar Space | Negative | 2c | 0 |
| 36 | 2.5 | Tongue | Negative | 2c | 0 |
| 37 | 3.6 | Lip | Positive | 0 | 0 |
| 38 | 4.6 | Retromolar Trigone | Negative | 1 | 1 |
| 39 | 2.5 | Floor of the mouth | Negative | 0 | 0 |
| 40 | 4.5 | Floor of the mouth | Negative | 2c | 0 |
| 41 | 3 | Floor of the mouth | Negative | 0 | 0 |
| 42 | 2.5 | Lip | Negative | 0 | 0 |
| 43 | 3.2 | Floor of the mouth | Positive | 1 | 0 |
| 44 | 3 | Inferior Gingiva | Negative | x | 0 |
| 45 | 3.5 | Retromolar Trigone | Negative | 1 | 1 |
| 46 | 1.4 | Hard Palate | Negative | x | 0 |
| 47 | 1 | Floor of the mouth | Negative | 2c | 0 |
| 48 | 1.2 | Floor of the mouth | Negative | 2c | 0 |
| 49 | 1.1 | Floor of the mouth | Positive | 2c | 0 |
| 50 | 5.1 | Tongue | Positive | 2c | 0 |
| 51 | 1.4 | Superior Gingiva | Negative | 0 | 0 |
| 52 | 4.6 | Inferior Gingiva | Negative | 2b | 0 |
| 53 | 6.2 | Floor of the mouth | Negative | 2c | 0 |
| 54 | * | Floor of the mouth | Negative | 0 | 0 |
| 55 | 3.4 | Floor of the mouth | Negative | 0 | 0 |
| 56 | 0.8 | Superior Gingiva | Negative | 2b | 0 |
| 57 | 2.3 | Floor of the mouth | Negative | 2c | 0 |
| 58 | 4.5 | Floor of the mouth | Positive | 2c | 0 |
| 59 | 3 | Floor of the mouth | Negative | 0 | 0 |
| 60 | 1.4 | Retromolar Trigone | Negative | 0 | 0 |
| 61 | 7.1 | Peritonsilar Space | Positive | 2b | 0 |
| 62 | 2 | Floor of the mouth | Positive | 2c | 1 |

*In 4 cases (9, 12, 13 and 54), the primary tumor had no recording of size before the cuts were processed. In one case (number 1), the tumor was 8.5 x 5.5cm and the primary site was not clear. All tumors were classified as pT4, following the 9th Edition of AJCC TNM Staging.
